# Supplementary material
Source: PubMed Central journal article supplement (PMC7441021)
Supplement: mmc1.pdf [file mmc1.pdf]

# A Survey of Intensive and High Dependency Care in South Asia

## AIMING FOR THE HIGHEST QUALITY IN CRITICAL CARE IN SOUTH ASIA

This survey aims to map intensive and high dependency care in the country that will lay the foundation for Pakistan Registry of Intensive Care (PRICE).

Mission of PRICE is to contribute to improvement of critical care services in Pakistan. We are grateful to Network for Improving Critical care Systems and Training (NICST) for sharing their expertise of mapping critical care resources and setting up a Critical Care Clinical Registry and bed availability system for Sri Lanka, a neighbouring country in the SAARC region with similar resource constraints as ours.

As a member of the critical care fraternity I request you to join us in working to improve the care of the sickest patients in our country.

This survey will take 10-15 minutes of your time to fill.

Please only give information regarding your own unit. More than one ICU/HDU in your institution will be invited to fill separate survey forms.

All information generated from this survey will be used to provide a published national profile of existing ICU resources in Pakistan. However identity of individual ICUs submitting information will not be revealed.

I appreciate and acknowledge your contribution and look forward to your support in contributing to PRICE!

**\* Required**

1. Email address \*

---

2. ICU name \*

---

3. Name of the hospital \*

---

## 4. Is the hospital \*

*Mark only one oval.*

- Government
- Private
- Not for profit hospital

## 5. Is the hospital \*

*Check all that apply.*

- Affiliated with a University
- Affiliated with a medical college
- Recognised for residency training
- Recognised for intensive care medicine training
- Recognised for internship training
- None of the above

## 6. Name of the person providing information

---

## 7. Designation of the person providing information

*Check all that apply.*

- Consultant ICU
- Fellow ICU
- Resident doctor
- Medical officer
- Nursing incharge
- Nurse
- Technician

**General information of the ICU**

8. No of total beds in the unit

---

9. No of beds currently closed

---

### Model of care

10. Please select the model of care from the following options

*Mark only one oval.*

- Open unit(ICU has access to multiple doctors who are free to admit and manage their patients )
- Closed unit(Admission, discharge and referral policies are under the control of consultant of ICU only. )
- Semi closed

### Specialist staff

11. Which of the following specialist doctors are available for consults?

*Check all that apply.*

- Anaesthesiologist
- General physician
- General surgeon
- Obstetric-gynaecologist
- Cardiothoracic Surgeon
- Cardiologist
- Nephrologist
- Gastroenterologist(Emergency endoscopies)
- Neurologist
- Microbiologist
- Respiratory disease specialist
- Urologic surgeon
- Haematologist
- Pathologist
- Orthopaedic surgeon
- Paediatrician

## Staffing

12. What is the PRIMARY speciality of the Consultant in charge of the ICU?

*Check all that apply.*

- Cardiologist
- Pulmonologist
- Emergency Physician
- Surgeon
- Anaesthetist
- Nephrologist
- Medicine
- No Incharge

13. Has the Consultant in charge of the ICU undergone training in Critical Care Medicine?

*Mark only one oval.*

Yes

No

14. Is there a non-consultant doctor assigned ONLY to ICU during the DAY with no other work commitment?

*Mark only one oval.*

yes

No

15. Is there a a non-consultant doctor assigned ONLY to ICU with no other work commitment during the NIGHT?

*Mark only one oval.*

yes

No

16. Who is the in charge of the ICU? \*

*Mark only one oval.*

Registered Nurse

Technician

17. Is the in-charge of the ICU specially trained (an ICU diploma qualification) in intensive care nursing?

*Mark only one oval.*

Yes

No

18. How many nurses designated to this ICU have completed ICU Training (Diploma)?

*Check all that apply.*

None

less than 5

less than 10

Other:  \_\_\_\_\_

19. What is the maximum number of SELF-VENTILATED patients 1 nurse looks after during the DAY?

*Mark only one oval.*

1

2

3

4

5

20. What is the maximum number of VENTILATED patients 1 nurse looks after during the DAY?

*Mark only one oval.*

- 1
- 2
- 3
- 4
- 5

21. What is the maximum number of SELF-VENTILATED patients 1 nurse looks after during the NIGHT?

*Mark only one oval.*

- 1
- 2
- 3
- 4
- 5

22. What is the maximum number of VENTILATED patients 1 nurse looks after during the NIGHT?

*Mark only one oval.*

- 1
- 2
- 3
- 4
- 5

23. What is the total no of Health Care Assistants (HCA) / Trained labourers in the unit?

*Mark only one oval.*

1

2

3

4

5

0

24. How many ICU trained technicians are there on the unit?

*Mark only one oval.*

1

2

3

4

5

0

25. Is a dedicated physiotherapist available?

*Mark only one oval.*

Yes

No



26. Are Radiology technicians for portable X ray available?

*Mark only one oval.*

Yes

No

### ICU Facilities

27. Does the ICU have a back up generator?

*Mark only one oval.*

Yes

No

28. When was the generator last used?

*Mark only one oval.*

today

yesterday

last week

last month

not known

Other: \_\_\_\_\_

29. How many ICU isolation rooms do you have

*Mark only one oval.*

- none
- 1
- 2
- 3
- more than 3
- Other: \_\_\_\_\_

30. How many beds are WITHOUT wall suction?

*Mark only one oval.*

- none
- 1
- 2
- 3
- 4
- more than 4
- ALL

31. How many beds are WITHOUT piped oxygen?

*Mark only one oval.*

none

1

2

3

4

more than 4

ALL

32. How many beds are WITHOUT piped medical air?

*Mark only one oval.*

none

1

2

3

4

more than 4

ALL

33. How many beds are WITHOUT a ventilator?

*Mark only one oval.*

- none
- 1
- 2
- 3
- 4
- more than 4

34. Is there paediatric mode in all ventilators?

*Mark only one oval.*

- Yes
- No

35. How many beds are WITHOUT a capnograph?

*Mark only one oval.*

- none
- 1
- 2
- 3
- 4
- more than 4
- ALL

36. How many beds are WITHOUT non-invasive monitoring?

*Mark only one oval.*

- none
- 1
- 2
- 3
- 4
- more than 4

37. How many beds are WITHOUT invasive arterial monitoring?

*Mark only one oval.*

- none
- 1
- 2
- 3
- 4
- more than 4
- ALL

38. Do you have the equipment to monitor Cardiac output ?

*Mark only one oval.*

- Yes
- No

39. If Yes- what type of equipment?

---

40. Is there a difficult or specialized airway trolley available in unit?

*Mark only one oval.*

Yes

No

41. Are syringe pumps available in the unit?

*Mark only one oval.*

yes

No

42. Are infusion pumps available in the unit?

*Mark only one oval.*

yes

no

43. Do you have access to Arterial Blood Gas machine?

*Mark only one oval.*

Yes

No

44. If yes, where it is located?

*Check all that apply.*

- Main hospital laboratory
- Satellite hospital laboratory
- Operation Theatres
- Another ICU
- Within ICU

45. If yes; how frequently is it serviced?

---

46. If yes; does it measure Hb?

*Mark only one oval.*

- yes
- No

47. If yes does it measure lactate?

*Mark only one oval.*

- yes
- No

48. Are there facilities for hand washing within the ICU?

*Mark only one oval.*

- Yes
- No

49. Can you browse the external internet from the ICU?

*Mark only one oval.*

Yes

No

50. Is there a DIRECT telephone line in ICU?

*Check all that apply.*

Direct

Intercom

51. When was the ICU last closed for an infection problem (not fumigation)?

*Mark only one oval.*

never

currently

last week

last month

last year

52. When was the ICU last closed (not related to infection)?

*Mark only one oval.*

never

currently

last week

last month

last year



53. Do you call the hospital cardiac arrest team when there is an emergency in the ICU?

*Mark only one oval.*

yes

no

54. When are visitors allowed in the unit?

*Mark only one oval.*

Anytime

Only during hospital visiting time

Only during timings specified by the ICU team

---

This content is neither created nor endorsed by Google.

Google Forms
